# Supplementary material for: A redox-active support for the synthesis of Au@SnO2 core–shell nanostructure and SnO2 quantum dots with efficient photoactivities
Source: Royal Society of Chemistry journal article supplement (doi:10.1039/d0ra06175a), 2020-01-01
Supplement: d0ra06175a1.pdf [file d0ra06175a1.pdf]

## Electronic Supplementary Information

### **A redox-active support for the synthesis of Au@SnO<sub>2</sub> core-shell nanostructure and SnO<sub>2</sub> quantum dots with efficient photoactivities**

Xiaoyang Pan,<sup>a\*</sup> Wen-Jie Chen,<sup>a</sup> Huizhen Cai,<sup>a</sup> Hui Li,<sup>a</sup> Xue jiao Sun,<sup>a</sup> Bo Weng<sup>b\*</sup>  
and Zhiguo Yi<sup>c\*</sup>

<sup>a</sup> *College of Chemistry and Materials, Quanzhou Normal University, Quanzhou, 362000, China.*

<sup>b</sup> *cMACS, Department of Microbial and Molecular Systems, KU Leuven, Celestijnenlaan 200F, 3001 Leuven, Belgium*

<sup>c</sup> *State Key Lab of High Performance Ceramics and Superfine Microstructure, Shanghai Institute of Ceramics, Chinese Academy of Sciences, Shanghai 200050, China.*

*\*To whom correspondence should be addressed*

*E-mail: [bo.weng@kuleuven.be](mailto:bo.weng@kuleuven.be); [xypan@qztc.edu.cn](mailto:xypan@qztc.edu.cn); [zhiguo@mail.sic.ac.cn](mailto:zhiguo@mail.sic.ac.cn);*

## Contents.

**Table S1.** The reductant, reaction temperature and organic agents involved during the synthesis of Au-metal oxide core-shell nanostructures.

**Fig. S1.** XRD patterns of SnNbOF.

**Fig. S2.** The XPS spectra of the SnNbOF: **a**, Survey spectrum; **b**, Sn 3d; **c**, Nb 3d; **d**, O 1s; **e**, F 1s.

**Fig. S3.** TEM (a) and HRTEM (b) images of Au@SnO<sub>2</sub> core-shell nanostructure of 3wt%Au-SnNbOF.

**Fig. S4.** The XPS spectra of the 10wt%Au-SnNbOF: **a**, Au 4f; **b**, Sn 3d.

**Fig. S5.** TEM and HRTEM images of SnO<sub>2</sub> dots of Au-SnNbOF nanocomposites: 3wt%Au-SnNbOF (a, b), 5wt%Au-SnNbOF (c, d) and 10wt%Au-SnNbOF (e, f).

**Fig. S6.** Additional TEM image of 0.5wt%Au-SnNbOF.

**Fig. S7.** UV-vis diffuse reflectance spectra of SnNbOF and Au-SnNbOF nanocomposites.

**Fig. S8.** The plot of transformed Kubelka-Munk function versus the light energy of SnNbOF (a); Mott-Schottky plot of SnNbOF (b).

**Fig. S9.** Energy band structure of SnNbOF.

**Fig. S10.** The kinetic rate constant curves of photocatalytic degradation of methyl orange under visible light irradiation over the samples.

**Fig. S11.** Recycled testing of photocatalytic activity of 5wt%Au-SnNbOF toward the methyl orange degradation under visible light irradiation ( $420 < \lambda < 800$  nm).

**Table S2.** Comparison of reaction rate constant of 5wt%Au-SnNbOF with those of other Photocatalysts reported in literatures.

**Fig. S12.** Electrochemical impedance spectroscopy (EIS) Nyquist plots of the sample electrodes of the blank SnNbOF and Au-SnNbOF nanocomposites.

**Fig. S13.** Photoluminescence spectra of the blank SnNbOF and 5wt%Au-SnNbOF nanocomposite.

**Fig. S14.** Schematic illustration of the charge transfer process over the Au-SnNbOF nanocomposite.

**Fig. S15.** Absorption spectrum of 5wt%Au-SnNbOF and action spectrum of MO oxidation on 5wt%Au-SnNbOF.

**Table S3.** The surface areas of the SnNbOF and Au-SnNbOF nanocomposites.

**Fig. S16.** ESR spectra for DMPO- O<sub>2</sub><sup>•-</sup> (a) and DMPO-•OH (b) formed in the aqueous

dispersions of 5wt%Au-SnNbOF.

**Table S1.** The reductant, reaction temperature and organic agents involved during the synthesis of Au-metal oxide core-shell nanostructures.

| NO. | Sample                            | Temperature/reductant     | Organic agents                   | References |
|-----|-----------------------------------|---------------------------|----------------------------------|------------|
| 1   | Au@SnO <sub>2</sub>               | R.T./NONE                 | NONE                             | This work  |
| 2   | Au-Cu <sub>2</sub> O              | 30 °C/ascorbic acid       | sodium dodecyl sulfate           | 1          |
| 3   | Au-Cu <sub>2</sub> O              | R.T./formaldehyde         | polyvinylpyrrolidone             | 2          |
| 4   | Au@Cu <sub>2</sub> O              | 0 °C /trisodium citrate   | polyvinylpyrrolidone             | 3          |
| 5   | Au@ZnO                            | 95/ citrate               | polydiallyldimethylammonium      | 4          |
| 6   | Au@TiO <sub>2</sub>               | R.T./trisodium citrate    | hydroxypropyl cellulose          | 5          |
| 7   | Au@Fe <sub>3</sub> O <sub>4</sub> | 95 °C / citrate           | polyvinylpyrrolidone             | 6          |
| 8   | Au@TiO <sub>2</sub>               | 180 °C /trisodium citrate | sodium citrate                   | 7          |
| 9   | Au@TiO <sub>2</sub>               | 180 °C /sodium citrate    | sodium citrate and ascorbic acid | 8          |
| 10  | Au@SnO <sub>2</sub>               | 850 °C /sodium citrate    | sodium citrate                   | 9          |
| 11  | Au@SnO <sub>2</sub>               | 60 °C/sodium citrate      | sodium citrate                   | 10         |
| 12  | Au@CeO <sub>2</sub>               | 160 °C /glucose           | glucose and urea                 | 11         |

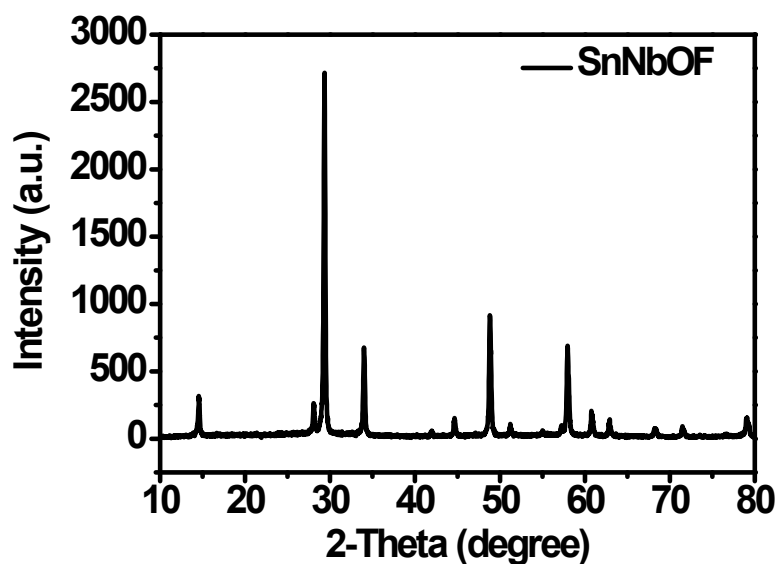

**Fig. S1.** XRD patterns of SnNbOF.

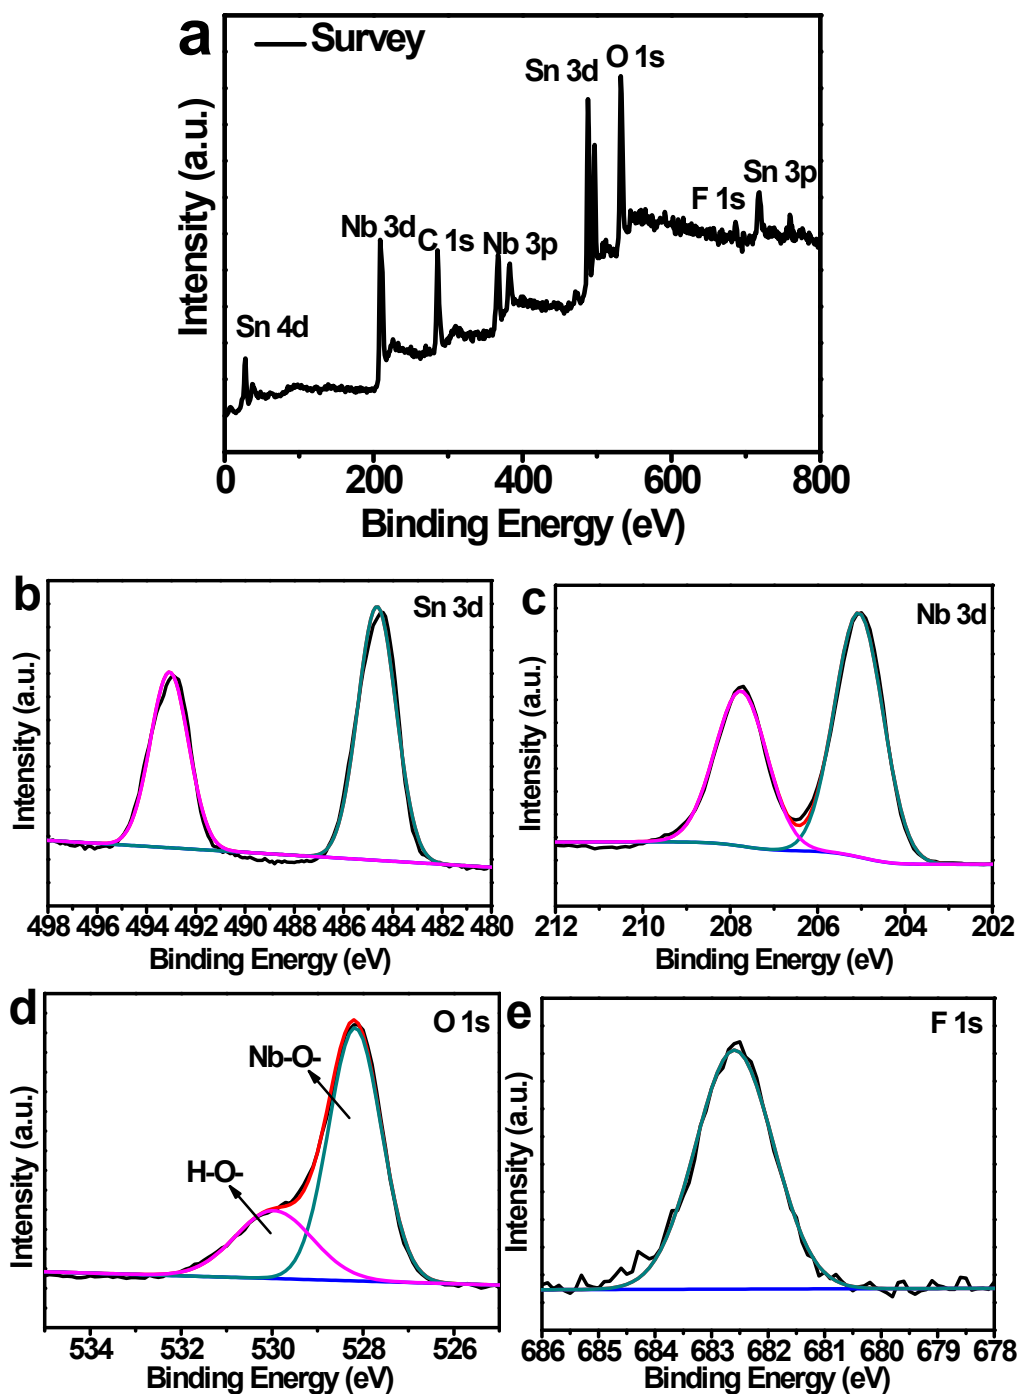

Fig. S2. The XPS spectra of the SnNbOF: a, Survey spectrum; b, Sn 3d; c, Nb 3d; d, O 1s; e, F 1s.

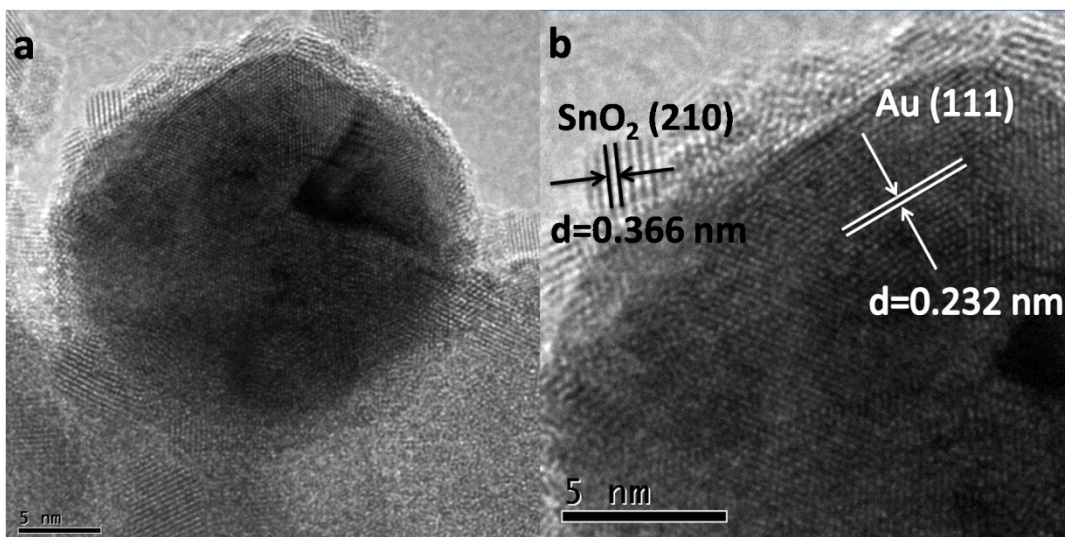

**Fig. S3.** TEM (a) and HRTEM (b) images of Au@SnO<sub>2</sub> core-shell nanostructure of 3wt%Au-SnNbOF.

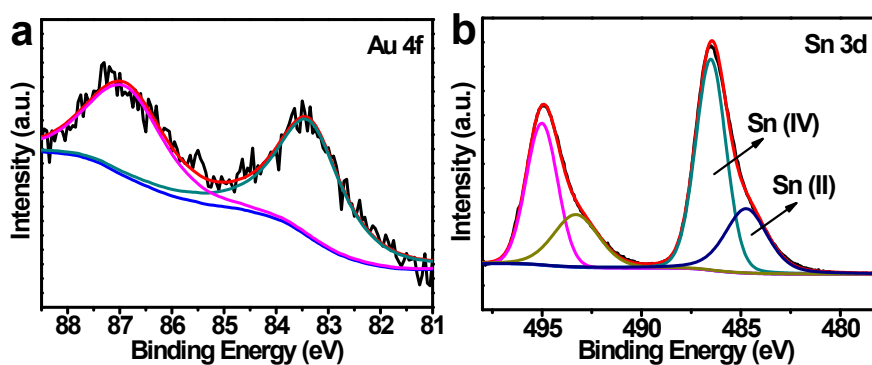

**Fig. S4.** The XPS spectra of the 10wt%Au-SnNbOF: **a**, Au 4f; **b**, Sn 3d.

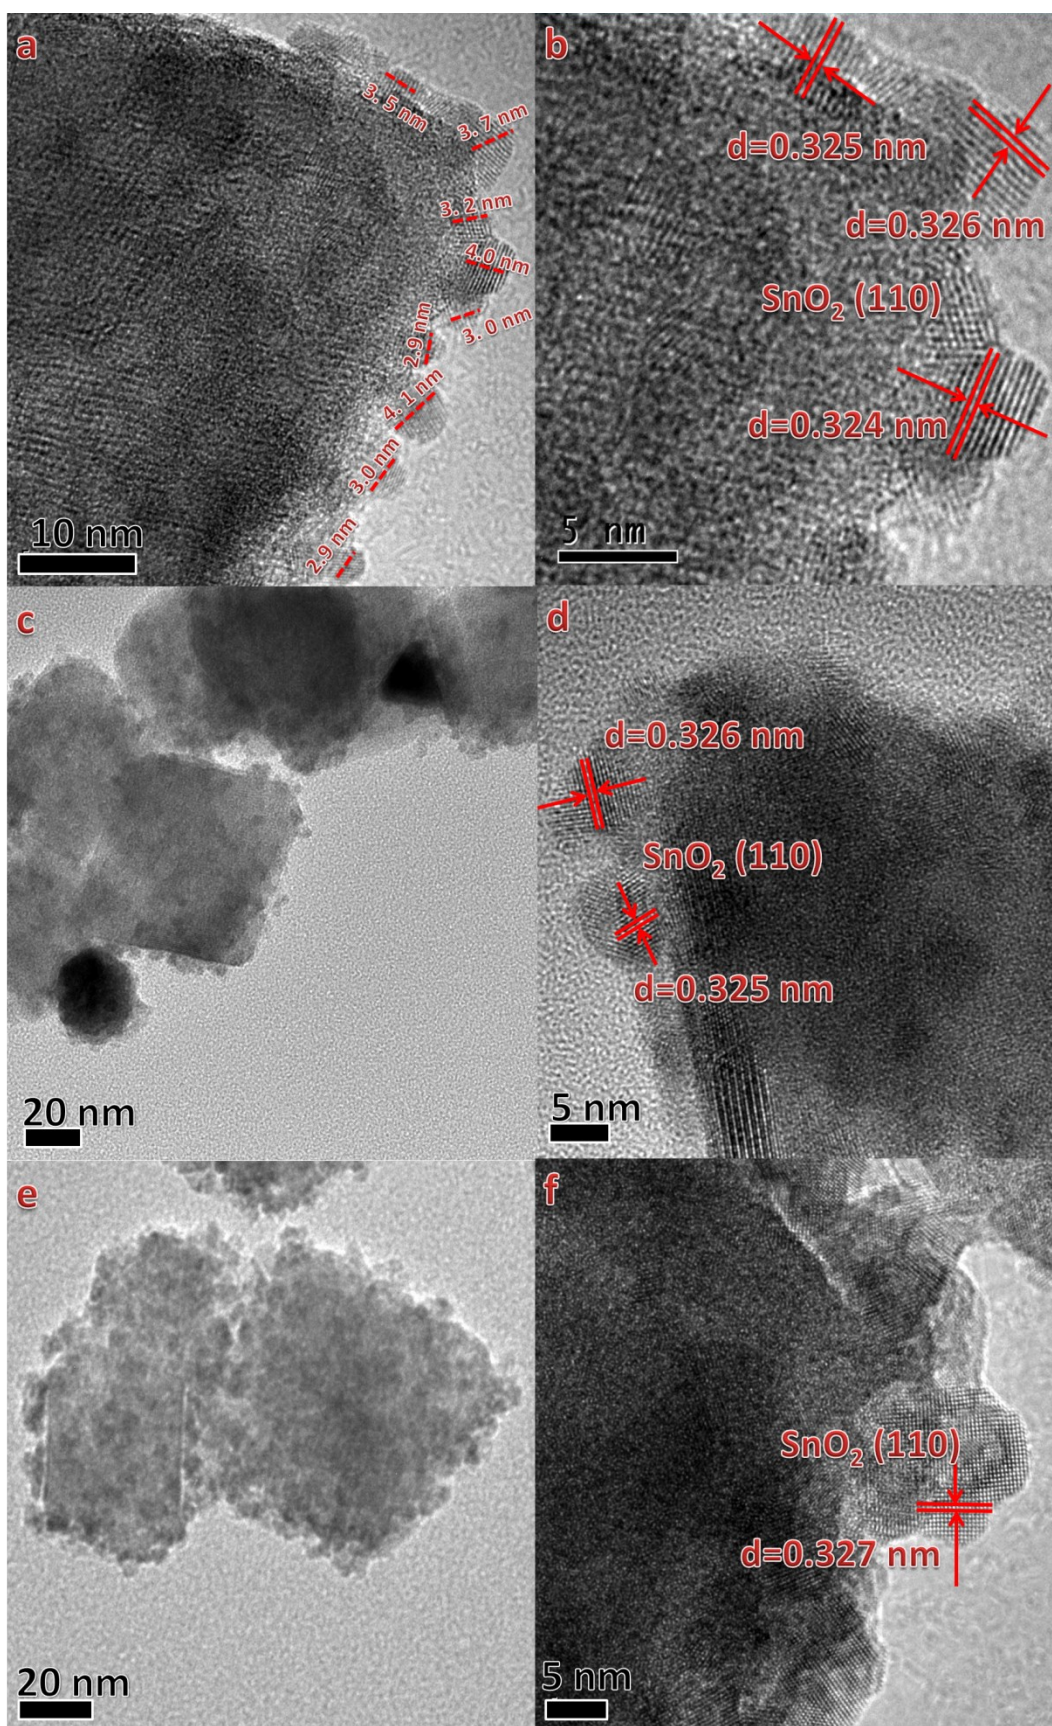

**Fig. S5.** TEM and HRTEM images of SnO<sub>2</sub> dots of Au-SnNbOF nanocomposites: 3wt% Au-SnNbOF (a, b), 5wt% Au-SnNbOF (c, d) and 10wt% Au-SnNbOF (e, f).

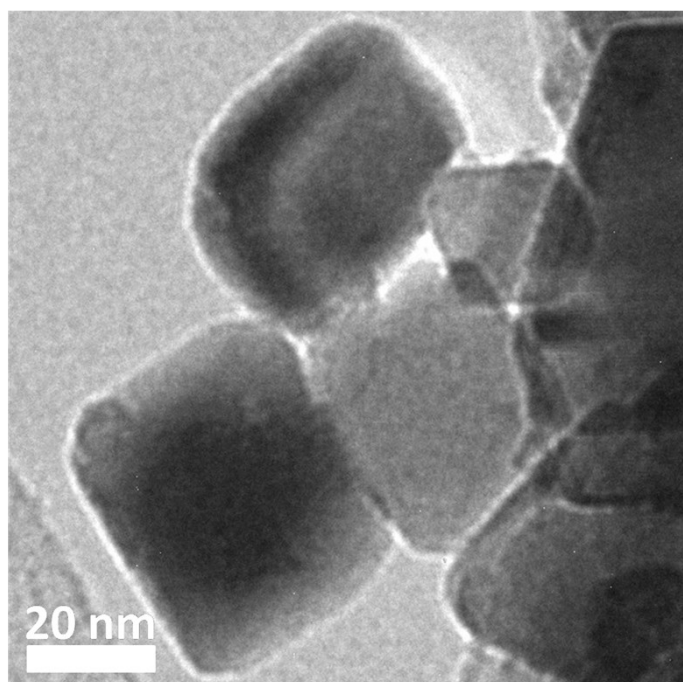

Fig. S6. Additional TEM image of 0.5wt% Au-SnNbOF.

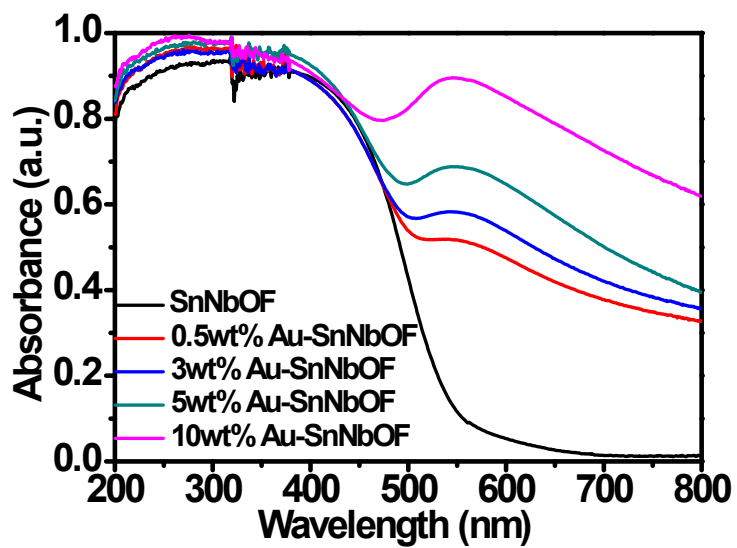

Fig. S7. UV-vis diffuse reflectance spectra of SnNbOF and Au-SnNbOF nanocomposites.



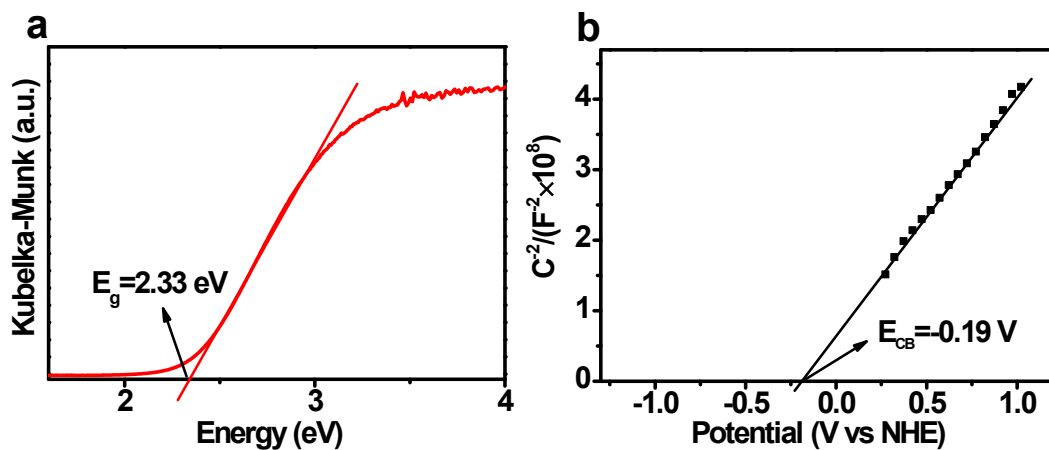

**Fig. S8.** The plot of transformed Kubelka-Munk function versus the light energy of SnNbOF (a); Mott-Schottky plot of SnNbOF (b).

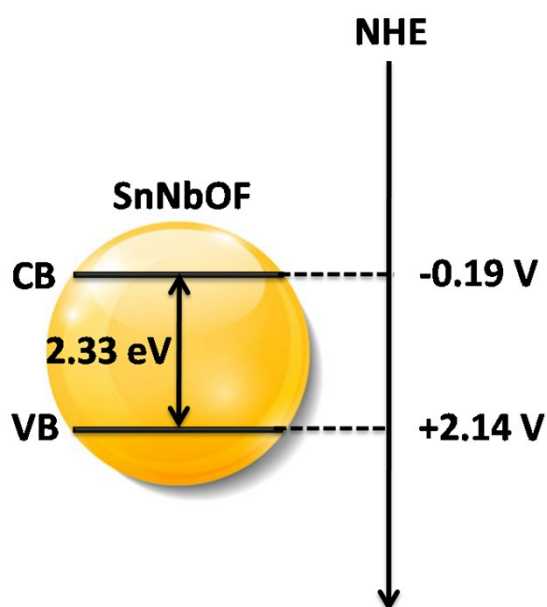

**Fig. S9.** Energy band structure of SnNbOF.

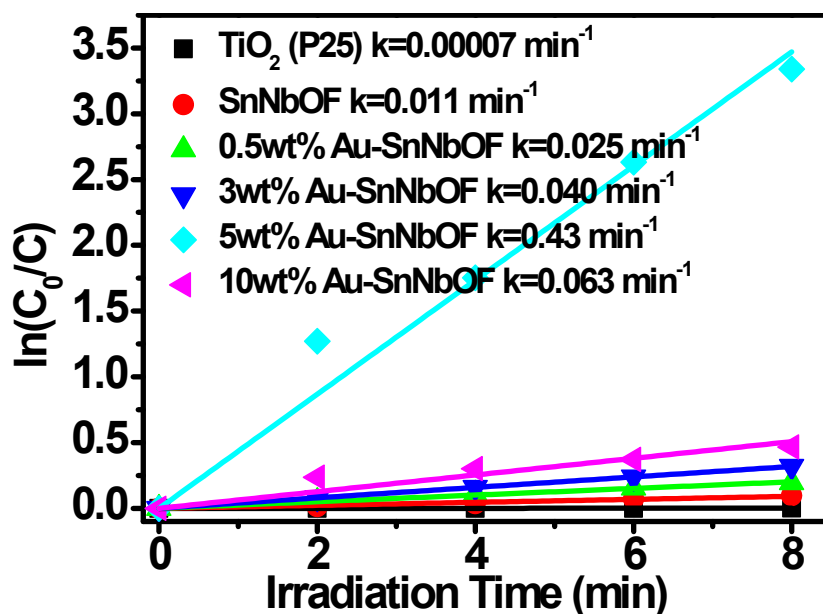

**Fig. S10.** The kinetic rate constant curves of photocatalytic degradation of methyl orange under visible light irradiation over the samples.

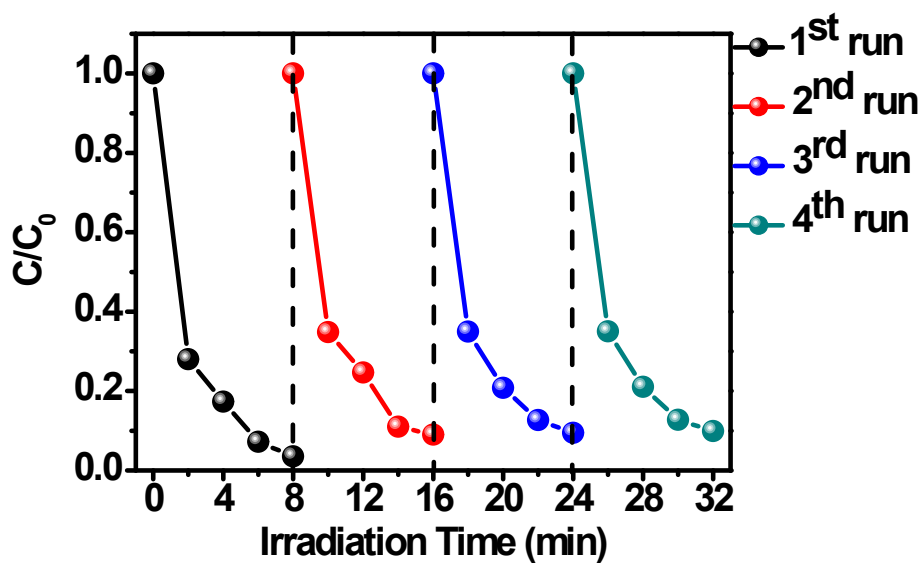

**Fig. S11.** Recycled testing of photocatalytic activity of 5wt% Au-SnNbOF toward the methyl orange degradation under visible light irradiation ( $420 < \lambda < 800$  nm).

**Table S2.** Comparison of reaction rate constant of 5wt%Au-SnNbOF with those of other photocatalysts reported in literatures.

| NO. | Photocatalysts                                                          | Rate Constant                  | Conditions                                                    | Literatures      |
|-----|-------------------------------------------------------------------------|--------------------------------|---------------------------------------------------------------|------------------|
| 1   | 5wt%Au-SnNbOF                                                           | <b>0.43 min<sup>-1</sup></b>   | 30 mg Catalyst MO (60 mL, 10 ppm) visible light irradiation   | <b>This work</b> |
| 2   | 95wt%TiO <sub>2</sub> /CNT                                              | <b>0.049 min<sup>-1</sup></b>  | 80 mg Catalyst MO (80 mL, 10 ppm) UV light irradiation        | 12               |
| 3   | P25 (TiO <sub>2</sub> )                                                 | <b>0.037 min<sup>-1</sup></b>  | 80 mg Catalyst MO (80 mL, 10 ppm) UV light irradiation        | 12               |
| 4   | 3.7%CdS-Bi <sub>2</sub> WO <sub>6</sub>                                 | <b>0.019 min<sup>-1</sup></b>  | 150 mg Catalyst MO (50 mL, 10 ppm) visible light irradiation  | 13               |
| 5   | 0.2wt%Co <sub>3</sub> O <sub>4</sub> / C <sub>3</sub> N <sub>4</sub>    | <b>0.017 min<sup>-1</sup></b>  | 100 mg Catalyst MO (100 mL, 10 ppm) visible light irradiation | 14               |
| 6   | 70wt% g-C <sub>3</sub> N <sub>4</sub> / Bi <sub>2</sub> WO <sub>6</sub> | <b>0.037 min<sup>-1</sup></b>  | 150 mg Catalyst MO (50 mL, 10 ppm) visible light irradiation  | 15               |
| 7   | Bi <sub>2</sub> WO <sub>6</sub>                                         | <b>0.0008 min<sup>-1</sup></b> | 150 mg Catalyst MO (50 mL, 10 ppm) visible light irradiation  | 15               |
| 8   | g-C <sub>3</sub> N <sub>4</sub>                                         | <b>0.009 min<sup>-1</sup></b>  | 150 mg Catalyst MO (50 mL, 10 ppm) visible light irradiation  | 15               |
| 9   | 40%AgBr/WO <sub>3</sub>                                                 | <b>0.016 min<sup>-1</sup></b>  | 100 mg Catalyst MO (100 mL, 10 ppm) visible light irradiation | 16               |
| 10  | TiO <sub>2</sub> nanosheets supported on carbon fibers                  | <b>0.058 min<sup>-1</sup></b>  | MO (5 ppm) UV light irradiation                               | 17               |
| 11  | TiO <sub>2</sub> nanosheets supported on FTO glass                      | <b>0.017 min<sup>-1</sup></b>  | MO (5 ppm) UV light irradiation                               | 17               |
| 12  | 0.06wt%Au-CdS-TiO <sub>2</sub>                                          | <b>0.012 min<sup>-1</sup></b>  | 150 mg Catalyst MO (100 mL, 10 ppm) visible light irradiation | 18               |
| 13  | CdS-TiO <sub>2</sub>                                                    | <b>0.0046 min<sup>-1</sup></b> | 150 mg Catalyst MO (100 mL, 10 ppm) visible light irradiation | 18               |
| 14  | SnO <sub>2</sub>                                                        | <b>0.0004 min<sup>-1</sup></b> | 2 mg Catalyst MO (20 mL, 10 ppm) visible light irradiation    | 19               |

|    |                     |                         |               |                                              |    |
|----|---------------------|-------------------------|---------------|----------------------------------------------|----|
| 15 | Ag-SnO <sub>2</sub> | 0.004 min <sup>-1</sup> | 2 mg Catalyst | MO (20 mL, 10 ppm) visible light irradiation | 19 |
|----|---------------------|-------------------------|---------------|----------------------------------------------|----|

**Note:** Only the optimized results of the composite photocatalyst are given in the table.

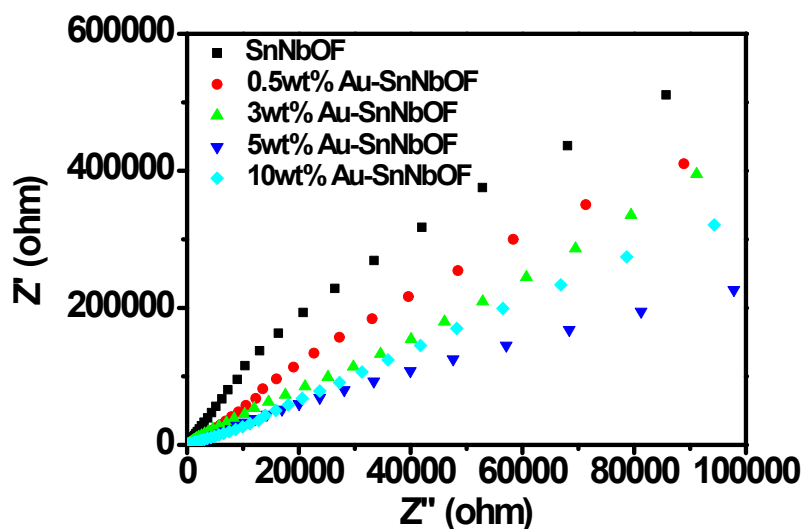

**Fig. S12.** Electrochemical impedance spectroscopy (EIS) Nyquist plots of the sample electrodes of the blank SnNbOF and Au-SnNbOF nanocomposites.

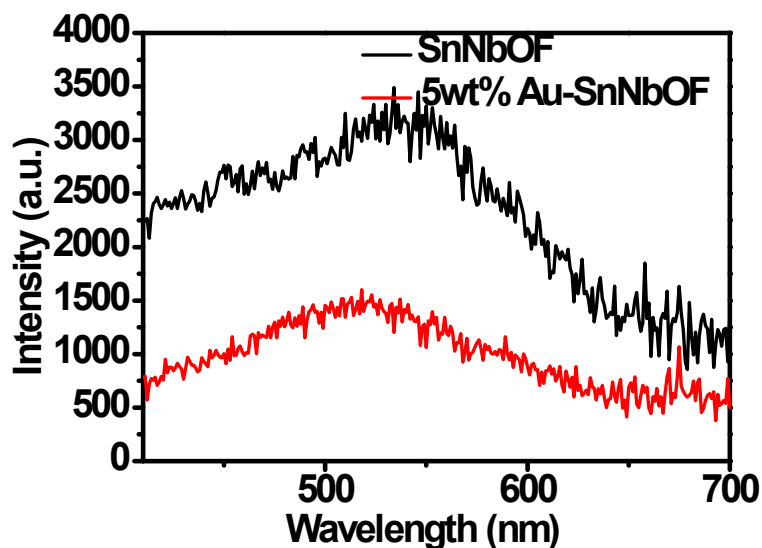

**Fig. S13.** Photoluminescence spectra of the blank SnNbOF and 5wt% Au-SnNbOF nanocomposite.

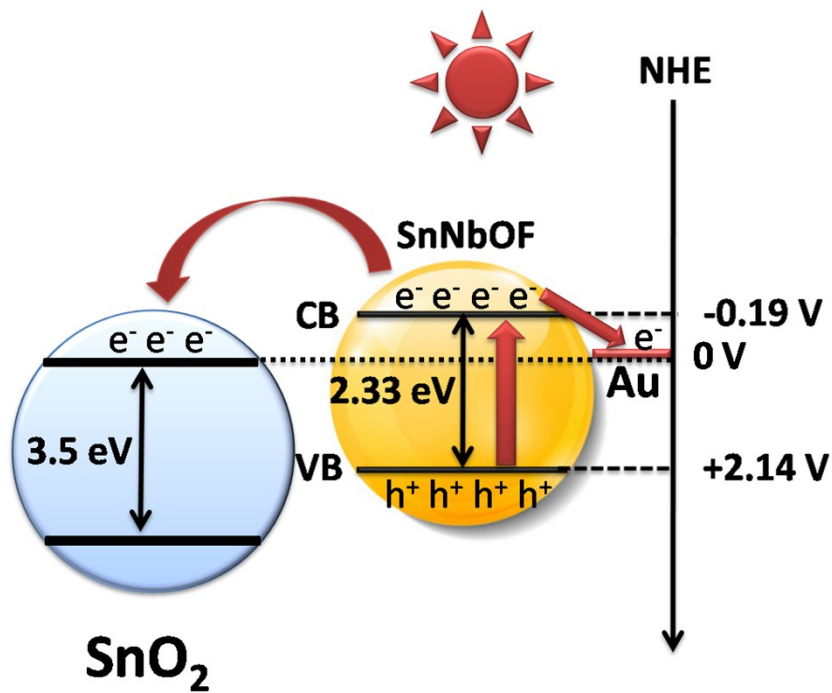

Fig. S14. Schematic illustration of the charge transfer process over the Au-SnNbOF nanocomposite.

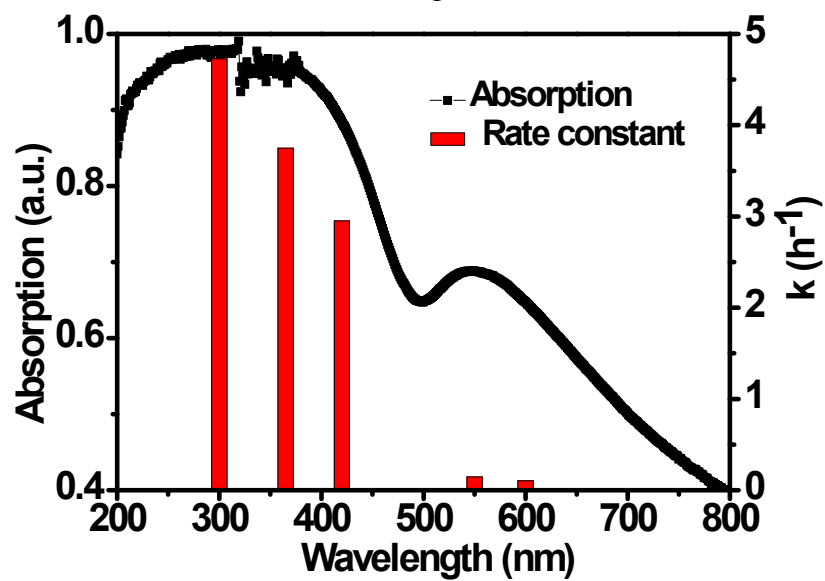

Fig. S15. Absorption spectrum of 5wt% Au-SnNbOF and action spectrum of MO oxidation on 5wt% Au-SnNbOF.

**Table S3.** The surface areas of the SnNbOF and Au-SnNbOF nanocomposites.

| Sample          | S <sub>BET</sub> (m <sup>2</sup> /g) |
|-----------------|--------------------------------------|
| SnNbOF          | 18                                   |
| 0.5wt%Au-SnNbOF | 21                                   |
| 3wt%Au-SnNbOF   | 25                                   |
| 5wt%Au-SnNbOF   | 31                                   |
| 10wt%Au-SnNbOF  | 40                                   |

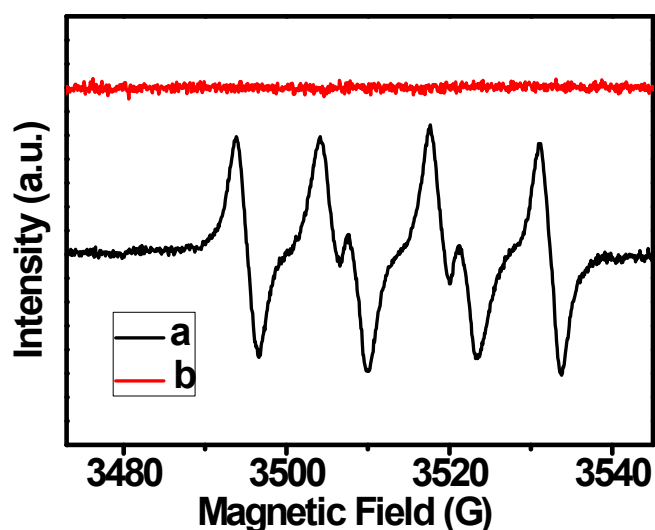

**Fig. S16.** ESR spectrum for DMPO- O<sub>2</sub><sup>•-</sup> (a) and DMPO-•OH (b) formed in the aqueous dispersions of 5wt%Au-SnNbOF.

## References

1. W.-C. Wang, L.-M. Lyu and M. H. Huang, *Chem. Mater.*, 2011, **23**, 2677.
2. L. Zhang, D. A. Blom and H. Wang, *Chem. Mater.*, 2011, **23**, 4587.
3. D.-Y. Liu, S.-Y. Ding, H.-X. Lin, B.-J. Liu, Z.-Z. Ye, F.-R. Fan, B. Ren and Z.-Q. Tian, *J. Phys. Chem. C*, 2012, **116**, 4477.
4. Y. Sun, Y. Sun, T. Zhang, G. Chen, F. Zhang, D. Liu, W. Cai, Y. Li, X. Yang and C. Li, *Nanoscale*, 2016, **8**, 10774.
5. Z. W. Seh, S. Liu, S.-Y. Zhang, K. W. Shah and M.-Y. Han, *Chem. Commun.*, 2011, **47**, 6689.
6. H. Sun, J. He, J. Wang, S.-Y. Zhang, C. Liu, T. Sritharan, S. Mhaisalkar, M.-Y. Han, D. Wang and H. Chen, *J. Am. Chem. Soc.*, 2013, **135**, 9099.
7. N. Zhang, S. Liu, X. Fu and Y.-J. Xu, *J. Phys. Chem. C*, 2011, **115**, 9136.
8. X.-F. Wu, H.-Y. Song, J.-M. Yoon, Y.-T. Yu and Y.-F. Chen, *Langmuir*, 2009, **25**, 6438.
9. K. Yu, Z. Wu, Q. Zhao, B. Li and Y. Xie, *J. Phys. Chem. C*, 2008, **112**, 2244.
10. G. Oldfield, T. Ung and P. Mulvaney, *Adv. Mater.*, 2000, **12**, 1519.
11. J. Qi, J. Chen, G. Li, S. Li, Y. Gao and Z. Tang, *Energy Environ. Sci.*, 2012, **5**,

8937.

12. Y.-J. Xu, Y. Zhuang and X. Fu, *J. Phys. Chem. C*, 2010, **114**, 2669.
13. L. Ge and J. Liu, *Appl. Catal., B*, 2011, **105**, 289.
14. C. Han, L. Ge, C. Chen, Y. Li, X. Xiao, Y. Zhang and L. Guo, *Appl. Catal., B*, 2014, **147**, 546.
15. L. Ge, C. Han and J. Liu, *Appl. Catal., B*, 2011, **108-109**, 100.
16. J. Cao, B. Luo, H. Lin and S. Chen, *J. Hazard. Mater.*, 2011, **190**, 700.
17. W. Guo, F. Zhang, C. Lin and Z. L. Wang, *Adv. Mater.*, 2012, **24**, 4761.
18. T. Lv, L. Pan, X. Liu and Z. Sun, *Electrochim. Acta*, 2012, **83**, 216.
19. S. A. Ansari, M. M. Khan, M. O. Ansari, J. Lee and M. H. Cho, *RSC Adv.*, 2014, **4**, 26013.
